# Supplementary material for: Radical Scavenging Activity of Puerarin: A Theoretical Study
Source: PubMed Central journal article supplement (PMC6943502; doi:10.3390/antiox8120590), 2019-11-26
Supplement: antioxidants-08-00590-s001.pdf [file antioxidants-08-00590-s001.pdf]

# Electronic Supplementary Information

## Radical Scavenging Activity of Puerarin: A Theoretical Study

Huakang Zhou<sup>1</sup>, Xiangzhou Li<sup>1</sup>, Yaxuan Shang<sup>1</sup>, and Kai Chen<sup>2,3,\*</sup>

<sup>1</sup> School of Materials Science and Engineering, Central South University of Forestry and Technology, Changsha 410004, P. R. China.

<sup>2</sup> College of Chemistry and Chemical Engineering, Central South University, Changsha 410083, P. R. China

<sup>3</sup> State Key Laboratory of Chemical Oncogenomics, Peking University Shenzhen Graduate School, Shenzhen 518055, P. R. China.

Correspondence: [cekchen@scut.edu.cn](mailto:cekchen@scut.edu.cn) (K.C.)

**Table S1. Thermal energies of all stationary points.**

| Species                             | $E_{\text{ele}}$ | $E_0$       | E           | H           | G           | $E_{\text{ele}}(\text{gas})$ | $E_{\text{ele}}(\text{ben})$ | $E_{\text{ele}}(\text{wat})$ |
|-------------------------------------|------------------|-------------|-------------|-------------|-------------|------------------------------|------------------------------|------------------------------|
| Puerarin                            | -1488.67784      | -1488.28077 | -1488.25505 | -1488.25410 | -1488.33662 | -1489.14536                  | -1489.17559                  | -1489.19382                  |
| Puerarin cation radical             | -1488.40329      | -1488.00609 | -1487.98019 | -1487.97925 | -1488.06302 | -1488.86016                  | -1488.92797                  | -1488.97474                  |
| Puerarin-4'-O <sup>-</sup> anion    | -1488.11763      | -1487.73444 | -1487.70893 | -1487.70798 | -1487.79036 | -1488.59503                  | -1488.65915                  | -1488.71499                  |
| Puerarin-4'-O <sup>•</sup> radical  | -1488.03615      | -1487.65228 | -1487.62681 | -1487.62587 | -1487.70875 | -1488.49697                  | -1488.52854                  | -1488.54605                  |
| Puerarin-7-O <sup>-</sup> anion     | -1488.15499      | -1487.77111 | -1487.74611 | -1487.74517 | -1487.82598 | -1488.62862                  | -1488.68443                  | -1488.72806                  |
| Puerarin-7-O <sup>•</sup> radical   | -1488.01879      | -1487.63615 | -1487.61017 | -1487.60923 | -1487.69359 | -1488.48076                  | -1488.51205                  | -1488.53170                  |
| daidzein                            | -878.156087      | -877.936105 | -877.921473 | -877.920529 | -877.978106 | -878.408222                  | -878.430274                  | -878.435672                  |
| Daidzein cation radical             | -877.884115      | -877.663587 | -877.649015 | -877.648071 | -877.706368 | -878.125341                  | -878.184521                  | -878.217057                  |
| Daidzein -4'-O <sup>-</sup> anion   | -877.590604      | -877.384515 | -877.370087 | -877.369143 | -877.426455 | -877.853076                  | -877.912479                  | -877.958192                  |
| Daidzein -4'-O <sup>•</sup> radical | -877.51507       | -877.308221 | -877.293841 | -877.292897 | -877.350815 | -877.760479                  | -877.783739                  | -877.787908                  |
| Daidzein -7-O <sup>-</sup> anion    | -877.611441      | -877.404926 | -877.390532 | -877.389588 | -877.44678  | -877.873457                  | -877.929082                  | -877.968893                  |
| Daidzein -7-O <sup>•</sup> radical  | -877.507335      | -877.300982 | -877.286555 | -877.285611 | -877.343652 | -877.752633                  | -877.774778                  | -877.776328                  |
| H <sub>2</sub> O                    | -76.37340        | -76.35187   | -76.34903   | -76.34809   | -76.36952   | -76.42082                    | -76.42535                    | -76.43476                    |
| H <sub>2</sub> O <sub>2</sub>       | -151.46819       | -151.44112  | -151.43791  | -151.43696  | -151.46274  | -151.53519                   | -151.54121                   | -151.55100                   |
| OH <sup>•</sup> radical             | -75.68866        | -75.68017   | -75.67781   | -75.67687   | -75.69711   | -75.72658                    | -75.73015                    | -75.73596                    |
| OOH <sup>•</sup> radical            | -150.83272       | -150.81815  | -150.81530  | -150.81435  | -150.84030  | -150.89052                   | -150.89637                   | -150.90318                   |
| TS(puerarin_4'-OH---OH)             | -1564.36826      | -1563.96451 | -1563.93656 | -1563.93562 | -1564.02450 | -1564.87203                  | -1564.90392                  | -1564.93598                  |
| TS(puerarin_7-OH---OH)              | -1564.36213      | -1563.95962 | -1563.93177 | -1563.93083 | -1564.01922 | -1564.86590                  | -1564.89699                  | -1564.91569                  |
| TS(puerarin_4'-OH---OOH)            | -1639.49690      | -1639.08866 | -1639.05987 | -1639.05892 | -1639.15080 | -1640.02182                  | -1640.05558                  | -1640.07849                  |
| TS(puerarin_7-OH---OOH)             | -1639.48532      | -1639.07777 | -1639.04877 | -1639.04783 | -1639.13861 | -1640.01027                  | -1640.04318                  | -1640.06827                  |

Notes:  $E_{\text{ele}}$ : electronic energy,  $E_0 = E_{\text{ele}} +$  Zero-point correction,  $E = E_{\text{ele}} +$  thermal correction to Energy,  $H = E_{\text{ele}} +$  thermal correction to Enthalpy, and  $G = E_{\text{ele}} +$  thermal correction to Gibbs free energy are calculated at M06-2X/6-31G(d) theoretical level;  $E_{\text{ele}}(\text{gas})$ ,  $E_{\text{ele}}(\text{ben})$ , and  $E_{\text{ele}}(\text{wat})$  are electronic energies in gas phase, benzene, and water, respectively, at M06-2X/6-311++G(d,p) theoretical level.

**Cartesian coordinates for all stationary points.**

|                               |           |           |           |                            |           |           |           |
|-------------------------------|-----------|-----------|-----------|----------------------------|-----------|-----------|-----------|
| H <sub>2</sub> O              |           |           |           | H                          | -4.642383 | 1.524093  | 1.360777  |
| O                             | 0.000000  | 0.000000  | 0.118474  | C                          | -6.675250 | -0.987686 | 0.308185  |
| H                             | 0.000000  | 0.762375  | -0.473898 | H                          | -6.072450 | -2.627688 | -0.954667 |
| H                             | -0.000000 | -0.762375 | -0.473898 | H                          | -7.009768 | 0.761688  | 1.499574  |
|                               |           |           |           | O                          | -7.946030 | -1.383633 | 0.452122  |
| H <sub>2</sub> O <sub>2</sub> |           |           |           | H                          | -8.227045 | -1.964270 | -0.371646 |
| O                             | -0.000000 | -0.713662 | -0.055435 | O                          | -3.024540 | 2.632037  | -0.002109 |
| H                             | -0.813023 | -0.891365 | 0.443482  | C                          | 2.478701  | -0.075109 | -0.096424 |
| O                             | 0.000000  | 0.713662  | -0.055435 | C                          | 3.045905  | -0.152573 | 1.332955  |
| H                             | 0.813023  | 0.891365  | 0.443482  | C                          | 4.050370  | -1.286243 | 1.414012  |
|                               |           |           |           | C                          | 5.121730  | -1.091875 | 0.358998  |
| HO•                           |           |           |           | C                          | 4.480238  | -0.991696 | -1.023780 |
| O                             | -0.000000 | -0.000000 | 0.108762  | H                          | 1.958004  | -1.016650 | -0.313742 |
| H                             | 0.000000  | 0.000000  | -0.870096 | O                          | 3.554378  | 0.093455  | -1.023206 |
|                               |           |           |           | C                          | 5.502324  | -0.734876 | -2.127281 |
| HOO•                          |           |           |           | H                          | 4.966373  | -0.477182 | -3.044726 |
| O                             | 0.055510  | -0.601672 | 0.000000  | H                          | 6.122720  | 0.131900  | -1.844713 |
| H                             | -0.888157 | -0.863496 | 0.000000  | O                          | 6.270776  | -1.878002 | -2.394851 |
| O                             | 0.055510  | 0.709609  | 0.000000  | H                          | 6.652962  | -2.174296 | -1.552800 |
|                               |           |           |           | H                          | 3.949300  | -1.928607 | -1.249883 |
| TS(puerarin_4'-OH----•OH)     |           |           |           | O                          | 6.034260  | -2.169442 | 0.362718  |
| C                             | 1.524676  | 1.084070  | -0.230522 | H                          | 6.301411  | -2.305257 | 1.286434  |
| C                             | 0.139893  | 0.894777  | -0.123971 | H                          | 5.643674  | -0.142221 | 0.566828  |
| C                             | 1.987401  | 2.400098  | -0.360076 | O                          | 4.700479  | -1.333853 | 2.663823  |
| C                             | -0.765888 | 1.954775  | -0.134739 | H                          | 4.007884  | -1.384210 | 3.341028  |
| C                             | 1.090805  | 3.484678  | -0.371176 | H                          | 3.523201  | -2.233925 | 1.212358  |
| C                             | -1.613346 | -0.637920 | 0.097725  | H                          | 3.559366  | 0.794869  | 1.561144  |
| C                             | -2.216291 | 1.717359  | -0.019530 | O                          | 2.042444  | -0.433654 | 2.282982  |
| C                             | -0.261574 | 3.259039  | -0.256622 | H                          | 1.478954  | 0.349046  | 2.375953  |
| H                             | 1.502007  | 4.482072  | -0.477365 | O                          | -8.642491 | -2.031399 | -1.675748 |
| C                             | -2.594108 | 0.289117  | 0.070626  | H                          | -8.280621 | -1.233915 | -2.105553 |
| H                             | -1.797619 | -1.700374 | 0.211850  |                            |           |           |           |
| H                             | -0.977685 | 4.074352  | -0.263364 | TS(puerarin_4'-OH----•OOH) |           |           |           |
| O                             | 3.299580  | 2.689221  | -0.458968 | C                          | 1.773235  | 1.085993  | -0.185013 |
| H                             | 3.777976  | 1.874272  | -0.709734 | C                          | 0.393646  | 0.881400  | -0.049021 |
| O                             | -0.290189 | -0.393627 | 0.009206  | C                          | 2.220303  | 2.409485  | -0.295428 |
| C                             | -4.008931 | -0.129074 | 0.133928  | C                          | -0.522369 | 1.932027  | -0.013371 |
| C                             | -4.435367 | -1.289317 | -0.529360 | C                          | 1.313329  | 3.485031  | -0.260021 |
| C                             | -4.952006 | 0.611445  | 0.866961  | C                          | -1.337172 | -0.675030 | 0.182962  |
| C                             | -5.745509 | -1.730412 | -0.438703 | C                          | -1.966646 | 1.677463  | 0.132034  |
| H                             | -3.730363 | -1.844462 | -1.141959 | C                          | -0.033628 | 3.243742  | -0.118061 |
| C                             | -6.269643 | 0.196749  | 0.943201  | H                          | 1.712523  | 4.488568  | -0.353299 |

|   |           |           |           |                        |           |           |           |
|---|-----------|-----------|-----------|------------------------|-----------|-----------|-----------|
| C | -2.327129 | 0.243604  | 0.207244  |                        |           |           |           |
| H | -1.508514 | -1.741517 | 0.278291  | TS(puerarin_7-OH---OH) |           |           |           |
| H | -0.757098 | 4.052007  | -0.089140 | C                      | 0.991776  | 0.947899  | 0.133172  |
| O | 3.526213  | 2.714203  | -0.419295 | C                      | -0.389504 | 0.711170  | 0.102212  |
| H | 4.007098  | 1.909718  | -0.698062 | C                      | 1.418152  | 2.283281  | 0.037943  |
| O | -0.021318 | -0.414861 | 0.064192  | C                      | -1.319601 | 1.744961  | -0.030921 |
| C | -3.732807 | -0.190973 | 0.311231  | C                      | 0.492090  | 3.334532  | -0.121086 |
| C | -4.167726 | -1.348590 | -0.354154 | C                      | -2.117853 | -0.864465 | 0.165060  |
| C | -4.655737 | 0.534244  | 1.094418  | C                      | -2.773094 | 1.462547  | -0.058787 |
| C | -5.469662 | -1.797073 | -0.226544 | C                      | -0.857727 | 3.063644  | -0.148973 |
| H | -3.479073 | -1.883206 | -1.002217 | H                      | 0.877102  | 4.345345  | -0.199979 |
| C | -5.959042 | 0.101723  | 1.220638  | C                      | -3.117999 | 0.029358  | 0.015671  |
| H | -4.330546 | 1.441098  | 1.588942  | H                      | -2.282844 | -1.930253 | 0.275996  |
| C | -6.393420 | -1.083282 | 0.577200  | H                      | -1.600521 | 3.847236  | -0.256643 |
| H | -5.816330 | -2.686657 | -0.741286 | O                      | 2.727484  | 2.574781  | 0.158051  |
| H | -6.680109 | 0.642300  | 1.824880  | H                      | 3.155402  | 2.758347  | -0.834824 |
| O | -7.627019 | -1.503524 | 0.734537  | O                      | -0.797980 | -0.583060 | 0.209682  |
| H | -8.196721 | -1.441294 | -0.269113 | C                      | -4.520299 | -0.429771 | -0.073001 |
| O | -2.784786 | 2.582212  | 0.180959  | C                      | -4.842625 | -1.604430 | -0.766084 |
| C | 2.741213  | -0.066639 | -0.102188 | C                      | -5.556138 | 0.281151  | 0.543170  |
| C | 3.341889  | -0.174824 | 1.311448  | C                      | -6.145152 | -2.075633 | -0.823992 |
| C | 4.359128  | -1.299879 | 1.340074  | H                      | -4.061557 | -2.146739 | -1.292415 |
| C | 5.403489  | -1.067434 | 0.265770  | C                      | -6.864854 | -0.180400 | 0.486861  |
| C | 4.729052  | -0.938621 | -1.098807 | H                      | -5.335494 | 1.205095  | 1.063562  |
| H | 2.224890  | -1.007738 | -0.331590 | C                      | -7.163662 | -1.361555 | -0.192498 |
| O | 3.792868  | 0.136880  | -1.048695 | H                      | -6.397750 | -2.980145 | -1.366352 |
| C | 5.722644  | -0.643576 | -2.218675 | H                      | -7.659453 | 0.381431  | 0.972569  |
| H | 5.163066  | -0.366828 | -3.116239 | O                      | -3.595806 | 2.360007  | -0.137044 |
| H | 6.342286  | 0.220998  | -1.927849 | C                      | 1.981569  | -0.184319 | 0.244108  |
| O | 6.493863  | -1.772369 | -2.534189 | C                      | 2.792829  | -0.121890 | 1.550968  |
| H | 6.899811  | -2.086277 | -1.709835 | C                      | 3.825924  | -1.230863 | 1.546580  |
| H | 4.201674  | -1.874559 | -1.336758 | C                      | 4.682006  | -1.112896 | 0.301534  |
| O | 6.326224  | -2.135123 | 0.220266  | C                      | 3.796106  | -1.197351 | -0.939435 |
| H | 6.617302  | -2.291411 | 1.133467  | H                      | 1.439878  | -1.139520 | 0.241904  |
| H | 5.920824  | -0.118037 | 0.485965  | O                      | 2.841432  | -0.141012 | -0.894025 |
| O | 5.038806  | -1.372108 | 2.572694  | C                      | 4.590737  | -1.040461 | -2.233715 |
| H | 4.363286  | -1.449024 | 3.264479  | H                      | 3.884596  | -0.921283 | -3.061865 |
| H | 3.836830  | -2.247603 | 1.126384  | H                      | 5.194130  | -0.119969 | -2.169015 |
| H | 3.851418  | 0.771570  | 1.552357  | O                      | 5.366803  | -2.176388 | -2.509078 |
| O | 2.362852  | -0.490133 | 2.276147  | H                      | 5.909858  | -2.350644 | -1.723051 |
| H | 1.797462  | 0.285893  | 2.405879  | H                      | 3.281637  | -2.170887 | -0.956421 |
| O | -8.601412 | -1.029957 | -1.341065 | O                      | 5.640857  | -2.149853 | 0.251874  |
| O | -7.435363 | -0.795753 | -2.011721 | H                      | 6.066559  | -2.175188 | 1.124238  |
| H | -7.333055 | 0.173528  | -1.966315 | H                      | 5.172208  | -0.125283 | 0.304719  |

|                           |           |           |           |                                  |           |           |           |
|---------------------------|-----------|-----------|-----------|----------------------------------|-----------|-----------|-----------|
| O                         | 4.688314  | -1.154514 | 2.660020  | C                                | -3.839917 | -0.964500 | 1.059868  |
| H                         | 4.125340  | -1.145250 | 3.449703  | H                                | -1.384818 | -1.270471 | 0.161212  |
| H                         | 3.303787  | -2.202605 | 1.527305  | O                                | -2.885114 | 0.031792  | 0.736606  |
| H                         | 3.308775  | 0.842571  | 1.618820  | C                                | -4.750294 | -0.382668 | 2.137200  |
| O                         | 1.961955  | -0.348203 | 2.674108  | H                                | -4.123613 | 0.047821  | 2.922926  |
| H                         | 1.458405  | 0.459740  | 2.849218  | H                                | -5.339788 | 0.437606  | 1.697976  |
| O                         | 3.651114  | 2.316028  | -1.912863 | O                                | -5.557197 | -1.372620 | 2.725423  |
| H                         | 3.308473  | 1.395365  | -1.923155 | H                                | -6.010555 | -1.838414 | 2.004356  |
| O                         | -8.425167 | -1.859259 | -0.281899 | H                                | -3.341862 | -1.861016 | 1.464755  |
| H                         | -9.036666 | -1.262629 | 0.172353  | O                                | -5.549724 | -2.350600 | 0.107549  |
| TS(puerarin_7-OH---->OOH) |           |           |           | H                                | -5.896441 | -2.678760 | -0.737743 |
| C                         | -0.939699 | 0.748143  | -0.393571 | H                                | -5.105924 | -0.444970 | -0.591296 |
| C                         | 0.440429  | 0.552874  | -0.311113 | O                                | -4.380318 | -2.159904 | -2.413351 |
| C                         | -1.403960 | 2.057808  | -0.697478 | H                                | -3.741108 | -2.392492 | -3.104634 |
| C                         | 1.355684  | 1.598254  | -0.481145 | H                                | -3.114458 | -2.734514 | -0.874871 |
| C                         | -0.472345 | 3.125779  | -0.852400 | H                                | -3.098070 | 0.117772  | -1.951148 |
| C                         | 2.195750  | -0.946806 | 0.067369  | O                                | -1.675210 | -1.321488 | -2.458297 |
| C                         | 2.812652  | 1.359055  | -0.373829 | H                                | -1.149375 | -0.602655 | -2.836998 |
| C                         | 0.876284  | 2.893155  | -0.750445 | O                                | -2.185166 | 2.488725  | 1.904162  |
| H                         | -0.876963 | 4.107553  | -1.074762 | H                                | -1.821322 | 3.377186  | 2.079785  |
| C                         | 3.181201  | -0.029946 | -0.042252 | O                                | -3.378593 | 2.759280  | 1.305103  |
| H                         | 2.380213  | -1.997754 | 0.259918  | Puerarin-4'-O <sup>-</sup> anion |           |           |           |
| H                         | 1.611926  | 3.681126  | -0.874404 | C                                | 1.102334  | 1.096271  | -0.118999 |
| O                         | -2.678698 | 2.295227  | -0.864915 | C                                | -0.280390 | 0.822855  | -0.094685 |
| H                         | -3.211445 | 2.347494  | 0.232558  | C                                | 1.505551  | 2.430993  | -0.032701 |
| O                         | 0.873089  | -0.713023 | -0.051511 | C                                | -1.233925 | 1.835789  | 0.010119  |
| C                         | 4.590386  | -0.422009 | 0.170306  | C                                | 0.559035  | 3.465522  | 0.065599  |
| C                         | 4.928994  | -1.351123 | 1.163491  | C                                | -1.986855 | -0.783173 | -0.103078 |
| C                         | 5.617221  | 0.106091  | -0.620324 | C                                | -2.685972 | 1.532256  | 0.020611  |
| C                         | 6.238712  | -1.765548 | 1.349818  | C                                | -0.784801 | 3.162028  | 0.086418  |
| H                         | 4.154644  | -1.738489 | 1.820365  | H                                | 0.922921  | 4.485521  | 0.120276  |
| C                         | 6.932982  | -0.299592 | -0.438347 | C                                | -3.027491 | 0.093145  | -0.090434 |
| H                         | 5.383757  | 0.844309  | -1.377816 | H                                | -2.115036 | -1.857076 | -0.103105 |
| C                         | 7.248113  | -1.239232 | 0.543356  | H                                | -1.543319 | 3.935033  | 0.160827  |
| H                         | 6.503607  | -2.478854 | 2.122555  | O                                | 2.815443  | 2.787712  | -0.021712 |
| H                         | 7.720440  | 0.117426  | -1.062027 | H                                | 3.332450  | 2.038155  | -0.371307 |
| O                         | 8.516965  | -1.671445 | 0.767069  | O                                | -0.647490 | -0.471683 | -0.142949 |
| H                         | 9.120243  | -1.218359 | 0.161252  | C                                | -4.401085 | -0.380412 | -0.189445 |
| O                         | 3.619171  | 2.258274  | -0.550442 | C                                | -4.701990 | -1.569815 | -0.897032 |
| C                         | -1.917426 | -0.382133 | -0.208233 | C                                | -5.484054 | 0.253495  | 0.468881  |
| C                         | -2.595658 | -0.766228 | -1.537572 | C                                | -5.964553 | -2.107428 | -0.934789 |
| C                         | -3.631088 | -1.839373 | -1.261174 | H                                | -3.905896 | -2.052510 | -1.466593 |
| C                         | -4.603474 | -1.347883 | -0.207045 | C                                | -6.752272 | -0.273906 | 0.448745  |

|                        |           |           |           |                                 |           |           |           |
|------------------------|-----------|-----------|-----------|---------------------------------|-----------|-----------|-----------|
| H                      | -5.296199 | 1.174371  | 1.012301  | O                               | -0.659717 | -0.488610 | -0.179487 |
| C                      | -7.090570 | -1.502965 | -0.245033 | C                               | -4.378536 | -0.424773 | -0.184423 |
| H                      | -6.169840 | -3.004833 | -1.513943 | C                               | -4.691311 | -1.577686 | -0.952652 |
| H                      | -7.565000 | 0.228349  | 0.968551  | C                               | -5.411525 | 0.216515  | 0.548501  |
| O                      | -8.242687 | -1.988350 | -0.263545 | C                               | -5.957453 | -2.094036 | -0.973939 |
| O                      | -3.500041 | 2.438679  | 0.112321  | H                               | -3.914129 | -2.032680 | -1.560582 |
| C                      | 2.094813  | -0.036377 | -0.112548 | C                               | -6.684500 | -0.287067 | 0.544287  |
| C                      | 2.596428  | -0.309375 | 1.316543  | H                               | -5.174660 | 1.109747  | 1.112065  |
| C                      | 3.648295  | -1.399653 | 1.285459  | C                               | -7.030142 | -1.476413 | -0.213223 |
| C                      | 4.764587  | -1.002989 | 0.343328  | H                               | -6.211999 | -2.966321 | -1.566936 |
| C                      | 4.188803  | -0.729107 | -1.045704 | H                               | -7.483122 | 0.181807  | 1.109809  |
| H                      | 1.620799  | -0.948057 | -0.498668 | O                               | -8.185132 | -1.941613 | -0.218513 |
| O                      | 3.214660  | 0.301563  | -0.944411 | O                               | -3.540741 | 2.384836  | 0.080673  |
| C                      | 5.251034  | -0.263785 | -2.036789 | C                               | 2.090914  | -0.034317 | -0.097308 |
| H                      | 4.751834  | 0.076330  | -2.948067 | C                               | 2.589949  | -0.290695 | 1.336551  |
| H                      | 5.784227  | 0.599188  | -1.603513 | C                               | 3.643938  | -1.381440 | 1.313417  |
| O                      | 6.126066  | -1.303709 | -2.395292 | C                               | 4.754586  | -0.993645 | 0.356648  |
| H                      | 6.441024  | -1.710061 | -1.571384 | C                               | 4.177579  | -0.722274 | -1.031587 |
| H                      | 3.722249  | -1.647925 | -1.432665 | H                               | 1.630641  | -0.956980 | -0.473980 |
| O                      | 5.735412  | -2.029344 | 0.255196  | O                               | 3.200230  | 0.312390  | -0.928974 |
| H                      | 5.914415  | -2.312733 | 1.166580  | C                               | 5.239159  | -0.268444 | -2.029366 |
| H                      | 5.223590  | -0.071884 | 0.716541  | H                               | 4.737325  | 0.097897  | -2.928944 |
| O                      | 4.226370  | -1.623905 | 2.555057  | H                               | 5.804172  | 0.571789  | -1.592663 |
| H                      | 3.488263  | -1.755876 | 3.171138  | O                               | 6.071584  | -1.330291 | -2.413982 |
| H                      | 3.178005  | -2.323040 | 0.908303  | H                               | 6.429317  | -1.727018 | -1.603143 |
| H                      | 3.049071  | 0.616879  | 1.707680  | H                               | 3.704362  | -1.637811 | -1.417000 |
| O                      | 1.574455  | -0.777854 | 2.164190  | O                               | 5.716826  | -2.022001 | 0.257888  |
| H                      | 0.847406  | -0.134914 | 2.159387  | H                               | 5.947668  | -2.276500 | 1.166175  |
|                        |           |           |           | H                               | 5.218955  | -0.063039 | 0.725166  |
|                        |           |           |           | O                               | 4.234037  | -1.578890 | 2.577909  |
| Puerarin-4'-O• radical |           |           |           | H                               | 3.513652  | -1.758886 | 3.201915  |
| C                      | 1.085754  | 1.088682  | -0.120025 | H                               | 3.174660  | -2.311962 | 0.952060  |
| C                      | -0.289971 | 0.825668  | -0.110881 | H                               | 3.044428  | 0.635097  | 1.723246  |
| C                      | 1.484546  | 2.430071  | -0.042580 | O                               | 1.554875  | -0.745147 | 2.179772  |
| C                      | -1.249168 | 1.832806  | -0.021491 | H                               | 0.959023  | -0.003555 | 2.362956  |
| C                      | 0.533456  | 3.463209  | 0.050496  |                                 |           |           |           |
| C                      | -1.965791 | -0.804553 | -0.192673 |                                 |           |           |           |
| C                      | -2.688647 | 1.516841  | -0.012728 | Puerarin-7-O <sup>-</sup> anion |           |           |           |
| C                      | -0.809170 | 3.163017  | 0.063529  | C                               | 1.353537  | 1.487814  | -0.018344 |
| H                      | 0.896314  | 4.483283  | 0.104277  | C                               | -0.007043 | 1.186339  | 0.001488  |
| C                      | -2.997222 | 0.071263  | -0.135088 | C                               | 1.755404  | 2.823799  | -0.377904 |
| H                      | -2.095779 | -1.880128 | -0.232594 | C                               | -1.026457 | 2.077391  | -0.364970 |
| H                      | -1.565514 | 3.938034  | 0.132554  | C                               | 0.695035  | 3.723484  | -0.782920 |
| O                      | 2.781948  | 2.789471  | -0.033046 | C                               | -1.622224 | -0.450777 | 0.465204  |
| H                      | 3.314745  | 2.039707  | -0.365101 | C                               | -2.428043 | 1.704917  | -0.330771 |

|   |           |           |           |   |           |           |           |
|---|-----------|-----------|-----------|---|-----------|-----------|-----------|
| C | -0.621433 | 3.369069  | -0.775253 | C | 1.133831  | 1.068328  | -0.140483 |
| H | 1.014908  | 4.717237  | -1.081796 | C | -0.227372 | 0.800930  | -0.092562 |
| C | -2.677614 | 0.305830  | 0.096838  | C | 1.556783  | 2.429171  | -0.455741 |
| H | -1.720111 | -1.464378 | 0.842514  | C | -1.194282 | 1.783914  | -0.365001 |
| H | -1.403376 | 4.062138  | -1.072456 | C | 0.533188  | 3.419163  | -0.762451 |
| O | 2.952228  | 3.250987  | -0.351849 | C | -1.917946 | -0.782003 | 0.256043  |
| O | -0.337604 | -0.077485 | 0.438205  | C | -2.639472 | 1.462422  | -0.311115 |
| C | -4.042094 | -0.261362 | 0.139625  | C | -0.788308 | 3.098760  | -0.707695 |
| C | -4.275398 | -1.605663 | -0.182387 | H | 0.884844  | 4.413978  | -1.013181 |
| C | -5.142778 | 0.518380  | 0.518139  | C | -2.945517 | 0.053338  | -0.010455 |
| C | -5.542240 | -2.169117 | -0.098735 | H | -2.054526 | -1.820540 | 0.535955  |
| H | -3.447829 | -2.218948 | -0.528617 | H | -1.573688 | 3.817635  | -0.915726 |
| C | -6.415791 | -0.034227 | 0.596457  | O | 2.760532  | 2.750156  | -0.432824 |
| H | -4.990492 | 1.568201  | 0.734339  | O | -0.607304 | -0.468835 | 0.228394  |
| C | -6.619205 | -1.379327 | 0.294581  | C | -4.335787 | -0.447509 | 0.000271  |
| H | -5.717546 | -3.209327 | -0.352885 | C | -4.634212 | -1.725445 | -0.492367 |
| H | -7.259622 | 0.586384  | 0.893842  | C | -5.382653 | 0.325803  | 0.514514  |
| O | -7.854207 | -1.967189 | 0.357302  | C | -5.923415 | -2.232741 | -0.451657 |
| H | -8.496759 | -1.292552 | 0.616455  | H | -3.845743 | -2.324554 | -0.940121 |
| O | -3.345231 | 2.474397  | -0.627140 | C | -6.678492 | -0.172142 | 0.555287  |
| C | 2.299698  | 0.368418  | 0.340915  | H | -5.181783 | 1.325671  | 0.879407  |
| C | 3.795023  | 0.707127  | 0.381095  | C | -6.953121 | -1.453561 | 0.077001  |
| C | 4.549537  | -0.542758 | 0.795925  | H | -6.157713 | -3.218114 | -0.839169 |
| C | 4.264926  | -1.672562 | -0.165481 | H | -7.481891 | 0.439245  | 0.959750  |
| C | 2.752945  | -1.895745 | -0.239586 | O | -8.200464 | -1.991291 | 0.089520  |
| H | 2.017844  | -0.037948 | 1.328607  | H | -8.822100 | -1.349589 | 0.461106  |
| O | 2.134621  | -0.689869 | -0.624705 | O | -3.481905 | 2.324370  | -0.505833 |
| C | 2.373260  | -2.954615 | -1.268150 | C | 2.166587  | 0.005711  | 0.119905  |
| H | 1.283795  | -2.970400 | -1.364241 | C | 3.001631  | 0.299145  | 1.382023  |
| H | 2.790094  | -2.659473 | -2.244798 | C | 4.040689  | -0.795782 | 1.528535  |
| O | 2.788975  | -4.247988 | -0.885304 | C | 4.864473  | -0.888167 | 0.259401  |
| H | 3.708214  | -4.166738 | -0.581774 | C | 3.944851  | -1.138391 | -0.935726 |
| H | 2.395428  | -2.225157 | 0.751938  | H | 1.657288  | -0.955314 | 0.284020  |
| O | 4.916738  | -2.867732 | 0.251749  | O | 3.002420  | -0.080945 | -1.019953 |
| H | 5.822633  | -2.605410 | 0.480543  | C | 4.707933  | -1.182155 | -2.256082 |
| H | 4.618332  | -1.378871 | -1.166869 | H | 3.984071  | -1.168678 | -3.075286 |
| O | 5.945622  | -0.309115 | 0.821973  | H | 5.325559  | -0.274031 | -2.339178 |
| H | 6.020361  | 0.593650  | 1.179109  | O | 5.464907  | -2.360158 | -2.380746 |
| H | 4.201192  | -0.843057 | 1.799883  | H | 6.013787  | -2.433166 | -1.583244 |
| H | 4.099444  | 0.986293  | -0.638630 | H | 3.431007  | -2.104379 | -0.797067 |
| O | 4.142666  | 1.708502  | 1.297893  | O | 5.803340  | -1.942492 | 0.350368  |
| H | 3.798757  | 2.523807  | 0.825231  | H | 6.262321  | -1.831773 | 1.198525  |
|   |           |           |           | H | 5.374486  | 0.076109  | 0.103609  |
|   |           |           |           | O | 4.929321  | -0.541398 | 2.594613  |

Puerarin-7-O• radical

|          |           |           |           |                         |           |           |           |
|----------|-----------|-----------|-----------|-------------------------|-----------|-----------|-----------|
| H        | 4.383332  | -0.407001 | 3.384733  | H                       | 5.823727  | 0.515774  | -1.661647 |
| H        | 3.519684  | -1.756405 | 1.681505  | O                       | 6.084570  | -1.411927 | -2.423212 |
| H        | 3.509337  | 1.262805  | 1.262542  | H                       | 6.449098  | -1.784891 | -1.604105 |
| O        | 2.209679  | 0.263654  | 2.556229  | H                       | 3.729134  | -1.688395 | -1.382400 |
| H        | 1.751188  | 1.110879  | 2.643817  | O                       | 5.768392  | -2.022085 | 0.272522  |
|          |           |           |           | H                       | 6.006278  | -2.252461 | 1.185425  |
|          |           |           |           | H                       | 5.278089  | -0.048911 | 0.685068  |
| Puerarin |           |           |           | O                       | 4.319391  | -1.509129 | 2.598680  |
| C        | 1.133064  | 1.082216  | -0.130203 | H                       | 3.605413  | -1.655462 | 3.238803  |
| C        | -0.244113 | 0.817938  | -0.101032 | H                       | 3.235219  | -2.286963 | 1.010575  |
| C        | 1.534161  | 2.423506  | -0.093863 | H                       | 3.120453  | 0.682451  | 1.693447  |
| C        | -1.199976 | 1.830588  | -0.030321 | O                       | 1.639951  | -0.682533 | 2.218650  |
| C        | 0.585896  | 3.460544  | -0.020440 | H                       | 1.024458  | 0.053200  | 2.356407  |
| C        | -1.928723 | -0.805107 | -0.122080 |                         |           |           |           |
| C        | -2.640654 | 1.516488  | -0.000952 |                         |           |           |           |
| C        | -0.756749 | 3.161584  | 0.013874  | Puerarin cation radical |           |           |           |
| H        | 0.950534  | 4.481225  | 0.001350  | C                       | 1.134803  | 1.114116  | -0.096325 |
| C        | -2.951968 | 0.073100  | -0.091809 | C                       | -0.235387 | 0.874346  | -0.084953 |
| H        | -2.064423 | -1.880678 | -0.135953 | C                       | 1.539240  | 2.459404  | 0.022809  |
| H        | -1.512280 | 3.938621  | 0.069192  | C                       | -1.201090 | 1.871203  | 0.041554  |
| O        | 2.834018  | 2.781127  | -0.107604 | C                       | 0.587278  | 3.488755  | 0.157647  |
| H        | 3.359547  | 2.022587  | -0.429822 | C                       | -1.886038 | -0.782954 | -0.232121 |
| O        | -0.613292 | -0.493751 | -0.127434 | C                       | -2.631026 | 1.554393  | 0.041213  |
| C        | -4.347898 | -0.410631 | -0.150142 | C                       | -0.757992 | 3.197523  | 0.169077  |
| C        | -4.691185 | -1.497602 | -0.965424 | H                       | 0.952976  | 4.505576  | 0.244232  |
| C        | -5.356570 | 0.188017  | 0.613029  | C                       | -2.952049 | 0.097611  | -0.131267 |
| C        | -5.985067 | -1.994742 | -1.002792 | H                       | -1.999179 | -1.859150 | -0.302558 |
| H        | -3.934758 | -1.947059 | -1.603342 | H                       | -1.505008 | 3.978141  | 0.267021  |
| C        | -6.656836 | -0.299409 | 0.578424  | O                       | 2.824404  | 2.815545  | 0.037107  |
| H        | -5.121324 | 1.046370  | 1.230222  | H                       | 3.371225  | 2.068721  | -0.287577 |
| C        | -6.975006 | -1.394173 | -0.225229 | O                       | -0.623781 | -0.449195 | -0.204910 |
| H        | -6.253379 | -2.831064 | -1.639013 | C                       | -4.293151 | -0.407266 | -0.181501 |
| H        | -7.430064 | 0.175274  | 1.178382  | C                       | -4.582553 | -1.691673 | -0.751688 |
| O        | -8.230432 | -1.911553 | -0.299384 | C                       | -5.393023 | 0.353986  | 0.335564  |
| H        | -8.821845 | -1.392311 | 0.263444  | C                       | -5.853730 | -2.182725 | -0.798000 |
| O        | -3.490788 | 2.387938  | 0.093944  | H                       | -3.791807 | -2.275593 | -1.208493 |
| C        | 2.136701  | -0.041296 | -0.089104 | C                       | -6.669499 | -0.138516 | 0.304415  |
| C        | 2.659140  | -0.254679 | 1.343311  | H                       | -5.198835 | 1.327471  | 0.763154  |
| C        | 3.711256  | -1.347050 | 1.337068  | C                       | -6.919962 | -1.410681 | -0.262810 |
| C        | 4.807625  | -0.990013 | 0.352888  | H                       | -6.086898 | -3.140990 | -1.248471 |
| C        | 4.208623  | -0.761300 | -1.033829 | H                       | -7.491521 | 0.439859  | 0.716864  |
| H        | 1.668459  | -0.973627 | -0.430361 | O                       | -8.122283 | -1.944303 | -0.333335 |
| O        | 3.234736  | 0.277034  | -0.948392 | H                       | -8.807560 | -1.362491 | 0.039214  |
| C        | 5.254413  | -0.339688 | -2.061760 | O                       | -3.492560 | 2.408410  | 0.149239  |
| H        | 4.738514  | -0.004396 | -2.965509 | C                       | 2.134250  | -0.015059 | -0.111979 |



|                                     |             |             |             |   |             |             |             |
|-------------------------------------|-------------|-------------|-------------|---|-------------|-------------|-------------|
| C                                   | 2.576635    | -0.377691   | 1.318859    | H | 2.13403100  | 1.86718600  | -0.83304800 |
| C                                   | 3.617892    | -1.482888   | 1.247044    | C | 4.92489700  | 0.01345500  | 0.03226100  |
| C                                   | 4.762277    | -1.047672   | 0.347564    | H | 4.75661500  | -1.95276100 | 0.93597700  |
| C                                   | 4.234539    | -0.664137   | -1.033196   | H | 4.59088700  | 1.98096800  | -0.81104300 |
| H                                   | 1.683533    | -0.908830   | -0.564322   | O | 6.17533900  | 0.06773400  | 0.04012100  |
| O                                   | 3.264326    | 0.379180    | -0.880317   | O | -0.01090500 | 2.05510500  | 0.20153500  |
| C                                   | 5.333217    | -0.161869   | -1.966700   | H | -3.88998200 | -2.15030800 | -0.27360800 |
| H                                   | 4.863980    | 0.304733    | -2.837121   |   |             |             |             |
| H                                   | 5.924711    | 0.609357    | -1.446728   |   |             |             |             |
| O                                   | 6.121240    | -1.221253   | -2.433356   |   |             |             |             |
| H                                   | 6.490645    | -1.677145   | -1.659849   |   |             |             |             |
| H                                   | 3.755192    | -1.536182   | -1.501694   |   |             |             |             |
| O                                   | 5.703965    | -2.082487   | 0.189974    |   |             |             |             |
| H                                   | 5.947539    | -2.386482   | 1.079671    |   |             |             |             |
| H                                   | 5.232366    | -0.156404   | 0.797661    |   |             |             |             |
| O                                   | 4.172340    | -1.768161   | 2.507422    |   |             |             |             |
| H                                   | 3.458426    | -2.088472   | 3.079345    |   |             |             |             |
| H                                   | 3.147684    | -2.379755   | 0.809730    |   |             |             |             |
| H                                   | 3.033953    | 0.506081    | 1.786758    |   |             |             |             |
| O                                   | 1.480876    | -0.854385   | 2.076057    |   |             |             |             |
| H                                   | 1.122588    | -0.124485   | 2.598887    |   |             |             |             |
| Daidzein -4'-O <sup>-</sup> anion   |             |             |             |   |             |             |             |
| C                                   | -3.58284800 | -1.12017900 | -0.13745200 |   |             |             |             |
| C                                   | -2.22613700 | -0.77890200 | -0.13734400 |   |             |             |             |
| C                                   | -4.51894100 | -0.11730800 | 0.03901500  |   |             |             |             |
| C                                   | -1.79991400 | 0.54150400  | 0.03269200  |   |             |             |             |
| C                                   | -4.11933300 | 1.21993300  | 0.21571400  |   |             |             |             |
| C                                   | -0.00458100 | -1.47303600 | -0.32406500 |   |             |             |             |
| C                                   | -0.35949600 | 0.89211900  | 0.05577300  |   |             |             |             |
| C                                   | -2.77450500 | 1.53110700  | 0.21198000  |   |             |             |             |
| H                                   | -4.87110600 | 1.99430500  | 0.35321300  |   |             |             |             |
| C                                   | 0.56263100  | -0.25761200 | -0.09720400 |   |             |             |             |
| H                                   | 0.57621400  | -2.36447200 | -0.52102200 |   |             |             |             |
| H                                   | -2.42479400 | 2.54980400  | 0.34781700  |   |             |             |             |
| O                                   | -5.83720500 | -0.47364200 | 0.03527200  |   |             |             |             |
| H                                   | -6.36804700 | 0.32347900  | 0.16890800  |   |             |             |             |
| O                                   | -1.34176000 | -1.77594400 | -0.31725100 |   |             |             |             |
| C                                   | 2.01209600  | -0.11927600 | 0.00126300  |   |             |             |             |
| C                                   | 2.80469000  | -1.18125700 | 0.49744400  |   |             |             |             |
| C                                   | 2.70787300  | 1.02588900  | -0.45615500 |   |             |             |             |
| C                                   | 4.17764600  | -1.13096000 | 0.52040400  |   |             |             |             |
| H                                   | 2.30187000  | -2.05659300 | 0.91262800  |   |             |             |             |
| C                                   | 4.08101300  | 1.09158300  | -0.44720100 |   |             |             |             |
| Daidzein -4'-O <sup>•</sup> radical |             |             |             |   |             |             |             |
| C                                   | -3.55793800 | -1.10902700 | -0.16688100 |   |             |             |             |
| C                                   | -2.21218400 | -0.76405500 | -0.12664500 |   |             |             |             |
| C                                   | -4.49965800 | -0.10228300 | 0.00205000  |   |             |             |             |
| C                                   | -1.78153900 | 0.54841300  | 0.07396300  |   |             |             |             |
| C                                   | -4.09808600 | 1.23071300  | 0.20713800  |   |             |             |             |
| C                                   | -0.00396700 | -1.50492600 | -0.25535300 |   |             |             |             |
| C                                   | -0.34692600 | 0.88296300  | 0.11143500  |   |             |             |             |
| C                                   | -2.75496200 | 1.54245700  | 0.24057300  |   |             |             |             |
| H                                   | -4.84914100 | 2.00542100  | 0.33762300  |   |             |             |             |
| C                                   | 0.55179700  | -0.28542900 | -0.05030600 |   |             |             |             |
| H                                   | 0.57927400  | -2.40209100 | -0.43021900 |   |             |             |             |
| H                                   | -2.41276600 | 2.56033900  | 0.39682800  |   |             |             |             |
| O                                   | -5.80244700 | -0.46319300 | -0.04036500 |   |             |             |             |
| H                                   | -6.36081800 | 0.31658000  | 0.09010600  |   |             |             |             |
| O                                   | -1.31628300 | -1.78009200 | -0.30030800 |   |             |             |             |
| C                                   | 2.01293400  | -0.15055300 | -0.00336000 |   |             |             |             |
| C                                   | 2.80759200  | -1.20387500 | 0.52273200  |   |             |             |             |
| C                                   | 2.65566500  | 1.01262400  | -0.50347400 |   |             |             |             |
| C                                   | 4.17298900  | -1.12867800 | 0.52810000  |   |             |             |             |
| H                                   | 2.31465600  | -2.06808100 | 0.95955400  |   |             |             |             |
| C                                   | 4.02129200  | 1.10575400  | -0.51136000 |   |             |             |             |
| H                                   | 2.04640800  | 1.82354500  | -0.88127600 |   |             |             |             |
| C                                   | 4.86056800  | 0.03687300  | -0.00054200 |   |             |             |             |
| H                                   | 4.78998100  | -1.92124400 | 0.93870000  |   |             |             |             |
| H                                   | 4.52899200  | 1.98098300  | -0.90346600 |   |             |             |             |
| O                                   | 6.10337200  | 0.11406400  | -0.00724800 |   |             |             |             |
| O                                   | 0.04821500  | 2.02600700  | 0.27414000  |   |             |             |             |
| H                                   | -3.86490200 | -2.13556100 | -0.32603900 |   |             |             |             |
| Daidzein -7-O <sup>-</sup> anion    |             |             |             |   |             |             |             |
| C                                   | -3.66134200 | -1.10346100 | -0.16298100 |   |             |             |             |
| C                                   | -2.33273100 | -0.76552400 | -0.12937900 |   |             |             |             |
| C                                   | -4.69397900 | -0.10461900 | 0.01412400  |   |             |             |             |
| C                                   | -1.86127400 | 0.55225900  | 0.07290300  |   |             |             |             |
| C                                   | -4.18966500 | 1.25333600  | 0.22091200  |   |             |             |             |

|                        |             |             |             |                         |             |             |             |
|------------------------|-------------|-------------|-------------|-------------------------|-------------|-------------|-------------|
| C                      | -0.11513400 | -1.52042000 | -0.27975900 | C                       | 3.94744400  | 1.03841900  | -0.55526000 |
| C                      | -0.45871200 | 0.87085000  | 0.10407200  | H                       | 1.97780900  | 1.72636400  | -1.04155500 |
| C                      | -2.85853200 | 1.54893500  | 0.24529000  | C                       | 4.71181600  | 0.03371200  | 0.03825900  |
| H                      | -4.94073200 | 2.02758200  | 0.35605000  | H                       | 4.68896400  | -1.83399300 | 1.08521800  |
| C                      | 0.43844100  | -0.30938800 | -0.06211400 | H                       | 4.43733300  | 1.90497100  | -0.99345200 |
| H                      | 0.47356200  | -2.41494900 | -0.46492300 | O                       | 6.06841200  | 0.08146900  | 0.10007700  |
| H                      | -2.50576900 | 2.56555400  | 0.40093400  | H                       | 6.37831200  | 0.90098600  | -0.31055400 |
| O                      | -5.91156500 | -0.36858600 | -0.00817300 | O                       | -0.05429900 | 1.99701900  | 0.23055200  |
| O                      | -1.42463600 | -1.79587900 | -0.32020700 | H                       | -3.99568400 | -2.13315600 | -0.33757000 |
| C                      | 1.90950500  | -0.17686500 | -0.01098800 |                         |             |             |             |
| C                      | 2.71024900  | -1.18649500 | 0.54176000  | Daidzein                |             |             |             |
| C                      | 2.55752700  | 0.95376300  | -0.52766900 | C                       | -3.62498100 | -1.09375400 | -0.17011000 |
| C                      | 4.09744100  | -1.10318200 | 0.54917100  | C                       | -2.27323600 | -0.76299300 | -0.14412300 |
| H                      | 2.23204400  | -2.04943900 | 0.99745900  | C                       | -4.55502200 | -0.08319700 | 0.02749000  |
| C                      | 3.94419700  | 1.05103400  | -0.51586200 | C                       | -1.83107200 | 0.54430400  | 0.07010300  |
| H                      | 1.95547600  | 1.76287100  | -0.92091600 | C                       | -4.14050200 | 1.24362200  | 0.24691700  |
| C                      | 4.71886300  | 0.02199100  | 0.01558900  | C                       | -0.07019800 | -1.51031500 | -0.31410300 |
| H                      | 4.71024200  | -1.88752900 | 0.98176500  | C                       | -0.39257200 | 0.86686200  | 0.09243800  |
| H                      | 4.42958300  | 1.93690800  | -0.92317100 | C                       | -2.79441000 | 1.54308700  | 0.26507900  |
| O                      | 6.08876300  | 0.07500100  | 0.04742200  | H                       | -4.88362000 | 2.02214200  | 0.39948600  |
| H                      | 6.36347100  | 0.92184000  | -0.33000100 | C                       | 0.49223800  | -0.30388000 | -0.08941200 |
| O                      | -0.00152600 | 2.01178100  | 0.25348800  | H                       | 0.50736600  | -2.40800000 | -0.50512500 |
| H                      | -3.95530100 | -2.13466100 | -0.32784700 | H                       | -2.44032800 | 2.55550900  | 0.43064200  |
|                        |             |             |             | O                       | -5.86381100 | -0.43174600 | -0.00135000 |
| Daidzein -7-O• radical |             |             |             | H                       | -6.41004900 | 0.35313400  | 0.14725800  |
| C                      | -3.66379100 | -1.11508400 | -0.16921300 | O                       | -1.39180300 | -1.78094700 | -0.34587400 |
| C                      | -2.32300400 | -0.79234200 | -0.14936900 | C                       | 1.96370500  | -0.17136700 | -0.02806700 |
| C                      | -4.65366000 | -0.08192600 | 0.03793800  | C                       | 2.74544700  | -1.16629600 | 0.57409700  |
| C                      | -1.88803700 | 0.52634100  | 0.06517300  | C                       | 2.61584300  | 0.93600800  | -0.58192100 |
| C                      | -4.17855900 | 1.27749200  | 0.26082900  | C                       | 4.12951800  | -1.08297700 | 0.60161100  |
| C                      | -0.11268000 | -1.52432800 | -0.32014900 | H                       | 2.25816300  | -2.01173200 | 1.05259200  |
| C                      | -0.44364800 | 0.84950200  | 0.08082400  | C                       | 4.00140400  | 1.03143300  | -0.55456600 |
| C                      | -2.84420100 | 1.55468000  | 0.27034400  | H                       | 2.03151200  | 1.73049600  | -1.02957600 |
| H                      | -4.93376000 | 2.04058200  | 0.41448900  | C                       | 4.76310700  | 0.02126300  | 0.03238700  |
| C                      | 0.44487200  | -0.31370900 | -0.09610500 | H                       | 4.73480700  | -1.84948400 | 1.07316000  |
| H                      | 0.47137100  | -2.41809600 | -0.50947500 | H                       | 4.49421600  | 1.89731300  | -0.99127300 |
| H                      | -2.45923500 | 2.55611300  | 0.43208300  | O                       | 6.12188900  | 0.06326200  | 0.08847500  |
| O                      | -5.87146200 | -0.35256400 | 0.02474800  | H                       | 6.43054600  | 0.88443600  | -0.31951000 |
| O                      | -1.43060600 | -1.80321100 | -0.35267000 | O                       | 0.01427700  | 2.00826200  | 0.24825100  |
| C                      | 1.91482200  | -0.17280200 | -0.03128800 | H                       | -3.94266000 | -2.11525200 | -0.34058000 |
| C                      | 2.69852700  | -1.16311400 | 0.57649400  |                         |             |             |             |
| C                      | 2.56274500  | 0.93618900  | -0.58689500 | daidzein cation radical |             |             |             |
| C                      | 4.08142300  | -1.07232100 | 0.60896800  | C                       | -3.59733600 | -1.11439500 | -0.11248500 |
| H                      | 2.21412900  | -2.00973200 | 1.05585300  | C                       | -2.26559200 | -0.75142000 | -0.08112500 |

|   |             |             |             |
|---|-------------|-------------|-------------|
| C | -4.54934000 | -0.09671500 | -0.00293200 |
| C | -1.82729300 | 0.56632800  | 0.05078100  |
| C | -4.14716600 | 1.24505700  | 0.13236600  |
| C | -0.06633200 | -1.54260000 | -0.16052400 |
| C | -0.39951700 | 0.89476400  | 0.07996500  |
| C | -2.80448800 | 1.56549800  | 0.15817600  |
| H | -4.89791800 | 2.02533800  | 0.21761800  |
| C | 0.51568700  | -0.29148100 | -0.02351800 |
| H | 0.50131200  | -2.45658100 | -0.29668100 |
| H | -2.47438600 | 2.59374300  | 0.26335100  |
| O | -5.83387100 | -0.47331400 | -0.03491300 |
| H | -6.42355900 | 0.29187700  | 0.04583600  |
| O | -1.35014400 | -1.78267200 | -0.19642300 |
| C | 1.94492200  | -0.17737300 | -0.00573700 |
| C | 2.77582700  | -1.30047700 | 0.32122000  |
| C | 2.59388700  | 1.06290400  | -0.31848000 |
| C | 4.13574800  | -1.20405500 | 0.32892900  |
| H | 2.32715400  | -2.24008600 | 0.62273500  |
| C | 3.95852300  | 1.16294600  | -0.32690700 |
| H | 1.98678600  | 1.92369700  | -0.56111700 |
| C | 4.74934600  | 0.03437200  | -0.00285900 |
| H | 4.77286500  | -2.03917400 | 0.59772400  |
| H | 4.43907000  | 2.10211900  | -0.58639000 |
| O | 6.06586000  | 0.05855700  | 0.01576700  |
| H | 6.42365300  | 0.93490900  | -0.21021500 |
| O | 0.01125200  | 2.03405600  | 0.20359400  |
| H | -3.90102500 | -2.14897500 | -0.21829000 |
